# Supplementary material for: Assessment and Suggestions on Sustainable Development of Regional Ecological Economy Based on Emergy Theory: A Case Study of Henan Province
Source: MDPI journal article supplement (doi:10.3390/su151612495), 2023-08-17
Supplement: s1 [file s1]

## Supplementary Materials:

The original data are mainly from China Statistical Yearbook, Henan Statistical Yearbook, government reports, Henan Provincial Bureau of Statistics and Henan Provincial Department of Ecology and Environment, etc. (see Table S1).

Table S1. Raw data of Henan Province from 2010 to 2018

| Resource item                   | Resource item Raw data |                       |                       |                       |                       |                       |                       |                       |                       | Energy conversion rate |
|---------------------------------|------------------------|-----------------------|-----------------------|-----------------------|-----------------------|-----------------------|-----------------------|-----------------------|-----------------------|------------------------|
|                                 | 2010                   | 2011                  | 2012                  | 2013                  | 2014                  | 2015                  | 2016                  | 2017                  | 2018                  | on rate                |
| Renewable resources             |                        |                       |                       |                       |                       |                       |                       |                       |                       |                        |
| Solar energy                    | 7.85×10 <sup>20</sup>  | 7.85×10 <sup>20</sup> | 7.85×10 <sup>20</sup> | 7.85×10 <sup>20</sup> | 7.85×10 <sup>20</sup> | 7.85×10 <sup>20</sup> | 7.85×10 <sup>20</sup> | 7.85×10 <sup>20</sup> | 7.85×10 <sup>20</sup> | 1.00×10 <sup>00</sup>  |
|                                 |                        |                       |                       |                       |                       |                       |                       |                       |                       |                        |
| Rainwater chemical energy       | 6.94×10 <sup>16</sup>  | 6.07×10 <sup>16</sup> | 4.99×10 <sup>16</sup> | 4.76×10 <sup>16</sup> | 5.99×10 <sup>16</sup> | 5.81×10 <sup>16</sup> | 6.49×10 <sup>16</sup> | 6.83×10 <sup>16</sup> | 6.23×10 <sup>16</sup> | 1.54×10 <sup>04</sup>  |
|                                 |                        |                       |                       |                       |                       |                       |                       |                       |                       |                        |
| Potential energy of rainwater   | 1.64×10 <sup>16</sup>  | 1.44×10 <sup>16</sup> | 1.18×10 <sup>16</sup> | 1.13×10 <sup>16</sup> | 1.42×10 <sup>16</sup> | 1.37×10 <sup>16</sup> | 1.54×10 <sup>16</sup> | 1.62×10 <sup>16</sup> | 1.47×10 <sup>16</sup> | 8.89×10 <sup>03</sup>  |
|                                 |                        |                       |                       |                       |                       |                       |                       |                       |                       |                        |
| Wind energy                     | 1.08×10 <sup>18</sup>  | 1.08×10 <sup>18</sup> | 1.08×10 <sup>18</sup> | 1.08×10 <sup>18</sup> | 1.08×10 <sup>18</sup> | 1.08×10 <sup>18</sup> | 1.08×10 <sup>18</sup> | 1.08×10 <sup>18</sup> | 1.08×10 <sup>18</sup> | 6.63×10 <sup>02</sup>  |
|                                 |                        |                       |                       |                       |                       |                       |                       |                       |                       |                        |
| Earth cycle energy              | 2.42×10 <sup>16</sup>  | 2.42×10 <sup>16</sup> | 2.42×10 <sup>16</sup> | 2.42×10 <sup>16</sup> | 2.42×10 <sup>16</sup> | 2.42×10 <sup>16</sup> | 2.42×10 <sup>16</sup> | 2.42×10 <sup>16</sup> | 2.42×10 <sup>16</sup> | 2.90×10 <sup>04</sup>  |
|                                 |                        |                       |                       |                       |                       |                       |                       |                       |                       |                        |
| Non-renewable natural resources |                        |                       |                       |                       |                       |                       |                       |                       |                       |                        |
| Topsoil loss (J)                | 6.59×10 <sup>16</sup>  | 6.59×10 <sup>16</sup> | 6.59×10 <sup>16</sup> | 6.59×10 <sup>16</sup> | 6.59×10 <sup>16</sup> | 6.59×10 <sup>16</sup> | 6.59×10 <sup>16</sup> | 6.59×10 <sup>16</sup> | 6.59×10 <sup>16</sup> | 7.40×10 <sup>04</sup>  |
|                                 |                        |                       |                       |                       |                       |                       |                       |                       |                       |                        |
| Natural gas (J)                 | 1.88×10 <sup>16</sup>  | 2.17×10 <sup>16</sup> | 2.89×10 <sup>16</sup> | 3.03×10 <sup>16</sup> | 3.03×10 <sup>16</sup> | 3.47×10 <sup>16</sup> | 3.47×10 <sup>16</sup> | 3.90×10 <sup>16</sup> | 4.19×10 <sup>16</sup> | 1.70×10 <sup>05</sup>  |
|                                 |                        |                       |                       |                       |                       |                       |                       |                       |                       |                        |
| Coal(J)                         | 3.62×10 <sup>19</sup>  | 4.05×10 <sup>19</sup> | 3.69×10 <sup>19</sup> | 3.37×10 <sup>19</sup> | 3.23×10 <sup>19</sup> | 3.41×10 <sup>19</sup> | 3.32×10 <sup>19</sup> | 3.31×10 <sup>19</sup> | 2.89×10 <sup>19</sup> | 9.71×10 <sup>04</sup>  |
|                                 |                        |                       |                       |                       |                       |                       |                       |                       |                       |                        |
| Coke (J)                        | 3.86×10 <sup>18</sup>  | 4.61×10 <sup>18</sup> | 4.92×10 <sup>18</sup> | 4.03×10 <sup>18</sup> | 5.98×10 <sup>18</sup> | 3.13×10 <sup>18</sup> | 2.98×10 <sup>18</sup> | 2.73×10 <sup>18</sup> | 3.15×10 <sup>18</sup> | 6.44×10 <sup>04</sup>  |
|                                 |                        |                       |                       |                       |                       |                       |                       |                       |                       |                        |
| Electricity (J)                 | 8.86×10 <sup>18</sup>  | 1.02×10 <sup>19</sup> | 1.04×10 <sup>19</sup> | 1.10×10 <sup>19</sup> | 1.12×10 <sup>19</sup> | 1.19×10 <sup>19</sup> | 1.21×10 <sup>19</sup> | 1.20×10 <sup>19</sup> | 1.30×10 <sup>19</sup> | 2.78×10 <sup>05</sup>  |
|                                 |                        |                       |                       |                       |                       |                       |                       |                       |                       |                        |
| Diesel (J)                      | 2.89×10 <sup>18</sup>  | 3.41×10 <sup>18</sup> | 3.75×10 <sup>18</sup> | 3.95×10 <sup>18</sup> | 4.06×10 <sup>18</sup> | 4.38×10 <sup>18</sup> | 4.71×10 <sup>18</sup> | 4.95×10 <sup>18</sup> | 5.05×10 <sup>18</sup> | 1.07×10 <sup>05</sup>  |
|                                 |                        |                       |                       |                       |                       |                       |                       |                       |                       |                        |
| Gasoline (J)                    | 1.47×10 <sup>18</sup>  | 1.81×10 <sup>18</sup> | 2.12×10 <sup>18</sup> | 2.77×10 <sup>18</sup> | 2.63×10 <sup>18</sup> | 3.39×10 <sup>18</sup> | 3.48×10 <sup>18</sup> | 3.68×10 <sup>18</sup> | 3.78×10 <sup>18</sup> | 1.06×10 <sup>05</sup>  |
|                                 |                        |                       |                       |                       |                       |                       |                       |                       |                       |                        |
| Input emergy                    |                        |                       |                       |                       |                       |                       |                       |                       |                       |                        |
| Gross                           | 4.65×                  | 6.19×                 | 7.18×                 | 7.96×                 | 8.46×                 | 8.39×                 | 9.39×                 | 1.02×                 | 1.12×                 | 8.61×                  |



|                           |                          |                          |                          |                       |                       |                       |                       |                       |                       |
|---------------------------|--------------------------|--------------------------|--------------------------|-----------------------|-----------------------|-----------------------|-----------------------|-----------------------|-----------------------|
| Topsoil Loss              | 4.88<br>$\times 10^{21}$ | 4.88<br>$\times 10^{21}$ | 4.88<br>$\times 10^{21}$ | $4.88 \times 10^{21}$ |
| Natural gas               | 3.19<br>$\times 10^{21}$ | 3.68<br>$\times 10^{21}$ | 4.91<br>$\times 10^{21}$ | $5.16 \times 10^{21}$ | $5.16 \times 10^{21}$ | $5.89 \times 10^{21}$ | $5.89 \times 10^{21}$ | $6.63 \times 10^{21}$ | $7.12 \times 10^{21}$ |
| Coal                      | 3.52<br>$\times 10^{24}$ | 3.94<br>$\times 10^{24}$ | 3.58<br>$\times 10^{24}$ | $3.27 \times 10^{24}$ | $3.13 \times 10^{24}$ | $3.31 \times 10^{24}$ | $3.22 \times 10^{24}$ | $3.22 \times 10^{24}$ | $2.81 \times 10^{24}$ |
| Coke                      | 2.49<br>$\times 10^{23}$ | 2.97<br>$\times 10^{23}$ | 3.17<br>$\times 10^{23}$ | $2.59 \times 10^{23}$ | $3.85 \times 10^{23}$ | $2.02 \times 10^{23}$ | $1.92 \times 10^{23}$ | $1.76 \times 10^{23}$ | $2.03 \times 10^{23}$ |
| Electricity               | 2.46<br>$\times 10^{24}$ | 2.82<br>$\times 10^{24}$ | 2.89<br>$\times 10^{24}$ | $3.04 \times 10^{24}$ | $3.12 \times 10^{24}$ | $3.32 \times 10^{24}$ | $3.36 \times 10^{24}$ | $3.34 \times 10^{24}$ | $3.61 \times 10^{24}$ |
| Diesel                    | 3.10<br>$\times 10^{23}$ | 3.65<br>$\times 10^{23}$ | 4.01<br>$\times 10^{23}$ | $4.23 \times 10^{23}$ | $4.35 \times 10^{23}$ | $4.68 \times 10^{23}$ | $5.04 \times 10^{23}$ | $5.30 \times 10^{23}$ | $5.40 \times 10^{23}$ |
| Gasoline                  | 1.55<br>$\times 10^{23}$ | 1.92<br>$\times 10^{23}$ | 2.25<br>$\times 10^{23}$ | $2.94 \times 10^{23}$ | $2.78 \times 10^{23}$ | $3.59 \times 10^{23}$ | $3.69 \times 10^{23}$ | $3.90 \times 10^{23}$ | $4.01 \times 10^{23}$ |
| Input resources           |                          |                          |                          |                       |                       |                       |                       |                       |                       |
| Total commodity purchases | 4.01<br>$\times 10^{23}$ | 5.33<br>$\times 10^{23}$ | 6.19<br>$\times 10^{23}$ | $6.85 \times 10^{23}$ | $7.29 \times 10^{23}$ | $7.22 \times 10^{23}$ | $8.08 \times 10^{23}$ | $8.76 \times 10^{23}$ | $9.65 \times 10^{23}$ |
| Total energy consumption  | 2.08<br>$\times 10^{19}$ | 2.24<br>$\times 10^{19}$ | 2.30<br>$\times 10^{19}$ | $2.13 \times 10^{19}$ | $2.22 \times 10^{19}$ | $2.17 \times 10^{19}$ | $2.17 \times 10^{19}$ | $2.15 \times 10^{19}$ | $2.20 \times 10^{19}$ |
| Output resources          |                          |                          |                          |                       |                       |                       |                       |                       |                       |
| GDP                       | 1.95<br>$\times 10^{24}$ | 2.27<br>$\times 10^{24}$ | 2.49<br>$\times 10^{24}$ | $2.72 \times 10^{24}$ | $2.98 \times 10^{24}$ | $3.19 \times 10^{24}$ | $3.47 \times 10^{24}$ | $3.86 \times 10^{24}$ | $4.30 \times 10^{24}$ |
| Gross merchandise sales   | 6.82<br>$\times 10^{23}$ | 8.04<br>$\times 10^{23}$ | 9.27<br>$\times 10^{23}$ | $1.05 \times 10^{24}$ | $1.19 \times 10^{24}$ | $1.33 \times 10^{24}$ | $1.49 \times 10^{24}$ | $1.66 \times 10^{24}$ | $1.83 \times 10^{24}$ |
| Total energy production   | 1.81<br>$\times 10^{19}$ | 1.78<br>$\times 10^{19}$ | 1.23<br>$\times 10^{19}$ | $1.28 \times 10^{19}$ | $1.15 \times 10^{19}$ | $2.18 \times 10^{19}$ | $2.16 \times 10^{19}$ | $2.15 \times 10^{19}$ | $2.15 \times 10^{19}$ |
| Wastewater                | 4.45<br>$\times 10^{22}$ | 4.70<br>$\times 10^{22}$ | 5.01<br>$\times 10^{22}$ | $5.12 \times 10^{22}$ | $5.24 \times 10^{22}$ | $5.38 \times 10^{22}$ | $4.99 \times 10^{22}$ | $5.07 \times 10^{22}$ | $6.33 \times 10^{22}$ |
| Waste gas                 | 2.46<br>$\times 10^{22}$ | 2.52<br>$\times 10^{22}$ | 2.35<br>$\times 10^{22}$ | $2.31 \times 10^{22}$ | $2.20 \times 10^{22}$ | $2.11 \times 10^{22}$ | $7.61 \times 10^{21}$ | $5.27 \times 10^{21}$ | $1.07 \times 10^{22}$ |
| Solid Waste               | 2.70<br>$\times 10^{23}$ | 3.67<br>$\times 10^{23}$ | 3.84<br>$\times 10^{23}$ | $4.10 \times 10^{23}$ | $4.01 \times 10^{23}$ | $3.71 \times 10^{23}$ | $3.59 \times 10^{23}$ | $4.43 \times 10^{23}$ | $4.61 \times 10^{23}$ |
